# Supplementary material
Source: HighWire-hosted journal article supplement (http://www.ajnr.org/highwire/filestream/52709/field_highwire_adjunct_files/0/4463_tables.pdf)
Supplement: 4463_tables.pdf [file 4463_tables.pdf]

**On-line Table 1: Detailed procedural data and outcome**

| No. | IVT | Occluded Artery (Segment) | IAT | LSN to GP    | GP to Recanal (min) | Retriever Used (No. of Passes)                           | Final TICl | Post- Procedural ICH/sICH | NIHSS on Admission | NIHSS at Discharge | mRS at Discharge | mRS at 3 Mo |
|-----|-----|---------------------------|-----|--------------|---------------------|----------------------------------------------------------|------------|---------------------------|--------------------|--------------------|------------------|-------------|
| 1   | –   | MCA (1)                   | –   | 9 hr 24 min  | 173                 | Trevo (3)<br>Solitaire (2)<br>ERIC (3)                   | 1          | ICH                       | 10                 | 10                 | 4                | 3           |
| 2   | Y   | MCA (1)                   | –   | 4 hr 32 min  | 90                  | ERIC (3)                                                 | 3          | –                         | 20                 | 19                 | 5                | 6           |
| 3   | –   | MCA (2)                   | –   | 7 hr 34 min  | 74                  | ERIC (1)                                                 | 3          | –                         | 16                 | †                  | 6                | 6           |
| 4   | Y   | MCA (1)                   | –   | 5 hr 15 min  | 179                 | ERIC (2)                                                 | 2b         | sICH                      | 21                 | 10                 | 4                | 3           |
| 5   | –   | MCA (2)                   | –   | 7 hr 34 min  | 136                 | ERIC (2)                                                 | 2b         | –                         | 8                  | 4                  | 4                | 2           |
| 6   | –   | MCA (1)                   | –   | 3 hr 29 min  | 36                  | ERIC (1)                                                 | 3          | –                         | 14                 | 11                 | 5                | 5           |
| 7   | –   | MCA (2)                   | Y   | 15 hr 20 min | 118                 | ERIC (1)                                                 | 2a         | –                         | 5                  | 3                  | 2                | 1           |
| 8   | –   | MCA (1)                   | –   | 2 hr 56 min  | 243                 | Trevo (2)<br>ERIC (3)<br>Penumbra 5Max (3)               | 2a         | –                         | 21                 | †                  | 6                | 6           |
| 9   | –   | MCA (1)                   | –   | 8 hr 25 min  | 181                 | Trevo (2)<br>ERIC (1)<br>Penumbra 5Max (1)               | 2a         | –                         | 11                 | 0                  | 2                | 2           |
| 10  | Y   | MCA (1)                   | –   | 3 hr 13 min  | 72                  | Penumbra 5Max (1)<br>ERIC (1)                            | 3          | –                         | 17                 | 16                 | 5                | 6           |
| 11  | Y   | ICA-T and MCA (1)         | –   | 6 hr 14 min  | 80                  | ERIC (3)                                                 | 3          | –                         | 18                 | 11                 | 4                | 4           |
| 12  | Y   | ICA-T                     | –   | 4 hr 33 min  | 144                 | ERIC (2)                                                 | 3          | sICH                      | 19                 | †                  | 6                | 6           |
| 13  | –   | MCA (1)                   | Y   | 10 hr 33 min | 161                 | ERIC (1)                                                 | 2b         | –                         | 20                 | 5                  | 3                | 1           |
| 14  | Y   | ICA-T                     | –   | 4 hr 00 min  | 195                 | Penumbra 5Max (3)<br>pREset (2) <sup>a</sup><br>ERIC (4) | 2b         | ICH                       | 20                 | 10                 | 4                | 3           |
| 15  | –   | MCA (2)                   | –   | 7 hr 01 min  | 58                  | ERIC (1)                                                 | 2b         | –                         | 6                  | 0                  | 0                | 0           |
| 16  | Y   | ICA-T                     | –   | 3 hr 01 min  | 166                 | Penumbra 5Max (2)<br>ERIC (2)                            | 2b         | –                         | 20                 | 9                  | 4                | 6           |
| 17  | –   | MCA (1)                   | –   | 10 hr 24 min | 43                  | ERIC (1)                                                 | 3          | –                         | 12                 | 8                  | 4                | 3           |
| 18  | –   | MCA (1)                   | –   | 12 hr 54 min | 46                  | ERIC (1)                                                 | 3          | –                         | 15                 | 2                  | 3                | 3           |
| 19  | Y   | MCA (1)                   | –   | 4 hr 55 min  | 45                  | ERIC (1)                                                 | 3          | –                         | 6                  | 8                  | 4                | 3           |
| 20  | Y   | MCA (1)                   | –   | 4 hr 45 min  | 105                 | ERIC (1)                                                 | 3          | –                         | 18                 | 9                  | 3                | 3           |
| 21  | Y   | ICA-T and MCA (2)         | –   | 3 hr         | 125                 | Penumbra 5Max (1)<br>ERIC (1)                            | 2b         | –                         | 21                 | 1                  | 1                | 1           |
| 22  | Y   | MCA (1)                   | –   | 5 hr 40 min  | 140                 | Trevo (2)<br>ERIC (3)                                    | 2b         | sICH                      | 18                 | 16                 | 5                | 4           |
| 23  | Y   | MCA (1)                   | –   | 2 hr 45 min  | 103                 | ERIC (1)                                                 | 2b         | –                         | 17                 | 11                 | 4                | 3           |
| 24  | Y   | MCA (1)                   | –   | 3 hr 39 min  | 36                  | ERIC (1)                                                 | 2a         | –                         | 19                 | 12                 | 4                | 3           |
| 25  | –   | MCA (1)                   | –   | 10 hr 23 min | 207                 | ERIC (4)                                                 | 1          | –                         | 21                 | †                  | 6                | 6           |
| 26  | –   | ICA-T and MCA (1)         | –   | 12 hr 12 min | 243                 | ERIC (2)                                                 | 3          | –                         | 20                 | 8                  | 4                | 4           |
| 27  | Y   | MCA (2)                   | –   | 2 hr 13 min  | 91                  | ERIC (2)                                                 | 3          | –                         | 5                  | 1                  | 1                | 0           |
| 28  | –   | MCA (1)                   | –   | 17 hr 10 min | 119                 | ERIC (1)                                                 | 3          | –                         | 27                 | †                  | 6                | 6           |
| 29  | Y   | MCA (2)                   | –   | 5 hr         | 60                  | ERIC (2)                                                 | 3          | –                         | 19                 | 2                  | 3                | 5           |
| 30  | Y   | MCA (2)                   | –   | 5 hr 50 min  | 95                  | ERIC (1)                                                 | 3          | –                         | 18                 | †                  | 6                | 6           |
| 31  | Y   | MCA (1) and ACA           | –   | 2 hr 45 min  | 65                  | ERIC (2)                                                 | 2b         | –                         | 23                 | †                  | 6                | 6           |
| 32  | –   | MCA (2)                   | –   | 3 hr 40 min  | 90                  | ERIC (1)                                                 | 3          | –                         | 5                  | 2                  | 2                | 2           |
| 33  | Y   | MCA (1)                   | –   | 3 hr 55 min  | 20                  | ERIC (1)                                                 | 3          | –                         | 20                 | 0                  | 0                | 0           |
| 34  | Y   | ICA-T                     | –   | 5 hr 15 min  | 30                  | ERIC (1)                                                 | 3          | –                         | 10                 | 0                  | 0                | 0           |
| 35  | –   | MCA (1)                   | –   | 6 hr         | 33                  | ERIC (1)                                                 | 3          | –                         | 5                  | 0                  | 2                | 2           |
| 36  | Y   | MCA (2)                   | –   | 3 hr 13 m    | 72                  | ERIC (1)                                                 | 2b         | –                         | 8                  | 0                  | 0                | 0           |

**Note:**—ACA indicates anterior cerebral artery; Recanal, recanalization; IAT, intra-arterial thrombolysis (urokinase); –, no; Y, yes; LSN to GP indicates time from last seen normal to groin puncture; ICA-T, ICA bifurcation; †, died.

<sup>a</sup> pREset (phenox GmbH, Bochum, Germany).

**On-line Table 2: Comparison of procedural data and outcome in selected reperfusion studies**

| Study                                                             | No.    | Median NIHSS at Baseline | IVT (%) | Onset to Endovascular Intervention Time (Mean) | Procedural Time (Mean) (min) | TICI 2-3 (%)    | mRS ≤2 at 90 Days (%) | Mortality at 90 Days (%) | sICH (%)       |
|-------------------------------------------------------------------|--------|--------------------------|---------|------------------------------------------------|------------------------------|-----------------|-----------------------|--------------------------|----------------|
| Intravenous thrombolysis                                          |        |                          |         |                                                |                              |                 |                       |                          |                |
| Pooling analysis of IV tPA trials within 6 hr, 2012 <sup>20</sup> | 7012   | NA                       | 100     | NA                                             | NA                           | NA              | 46 <sup>a</sup>       | 19 <sup>a</sup>          | 8              |
| Intra-arterial thrombolysis                                       |        |                          |         |                                                |                              |                 |                       |                          |                |
| PROACT II, 1999 <sup>21</sup>                                     | 121    | 17                       | 0       | 4 hr 42 min <sup>b</sup>                       | NA                           | 66              | 40                    | 25                       | 10             |
| MELT, 2007 <sup>22</sup>                                          | 57     | 14                       | 0       | 3 hr 19 min                                    | NA                           | 74              | 49                    | 5                        | 9              |
| IMS I, 2004 <sup>23</sup>                                         | 62     | 18                       | 100     | 3 hr 03 min <sup>c</sup>                       | NA                           | 56              | 43                    | 16                       | 6              |
| IMS II, 2007 <sup>24</sup>                                        | 55     | 19                       | 100     | NA                                             | NA                           | 60              | 46                    | 16                       | 10             |
| Ribo et al, 2014 <sup>7</sup>                                     | 127    | 19                       | 63      | 3 hr 57 min                                    | 103                          | 51 <sup>d</sup> | 34                    | NA                       | 11             |
| RECANALISE, 2009 <sup>25</sup>                                    | 53     | 14                       | 100     | NA                                             | NA                           | 87              | 57                    | 17                       | 9              |
| Mechanical thrombectomy                                           |        |                          |         |                                                |                              |                 |                       |                          |                |
| Merci, Smith et al, 2005 <sup>6</sup>                             | 141    | 20 <sup>e</sup>          | 0       | 4 hr 18 min                                    | 126                          | 48              | 28                    | 44                       | 8              |
| MultiMerci, Smith et al, 2008 <sup>27</sup>                       | 164    | 19                       | 29      | 4 hr 18 min <sup>c</sup>                       | 96 <sup>c</sup>              | 68              | 36                    | 34                       | 10             |
| Merci, Ribo et al, 2014 <sup>7</sup>                              | 119    | 17                       | 40      | 4 hr 21 min                                    | 128                          | 57 <sup>d</sup> | 37                    | NA                       | 12             |
| Penumbra, PST, 2009 <sup>28</sup>                                 | 125    | 18 <sup>e</sup>          | NA      | 4 hr 18 min                                    | NA                           | 82              | 25                    | 33                       | 11             |
| Penumbra, Menon et al, 2011 <sup>29</sup>                         | 27     | 18                       | 63      | 3 hr 12 min <sup>c</sup>                       | 80 <sup>c</sup>              | 85              | 45                    | 19                       | 4 <sup>f</sup> |
| Solitair, Castaño et al, 2010 <sup>30</sup>                       | 20     | 19                       | 50      | 5 hr 22 min                                    | 81                           | 100             | 48                    | 20                       | 10             |
| Solitair, Roth et al, 2010 <sup>31</sup>                          | 22     | 19                       | 59      | NA                                             | NA                           | 91              | 50                    | 23                       | 9              |
| Solitair, Miteff et al, 2011 <sup>32</sup>                        | 26     | 22                       | 0       | 7 hr 38 min (4 hr 03 min <sup>f</sup> )        | 96                           | 96              | 42                    | 19                       | 8              |
| Solitair, Wehrschoetz et al, 2011 <sup>33</sup>                   | 11     | 16                       | NA      | NA                                             | NA                           | 100             | 30                    | 9                        | 0              |
| Solitair, Dorn et al, 2012 <sup>34</sup>                          | 104    | 15                       | 56      | NA                                             | 47                           | 93              | NA                    | NA                       | 2              |
| SWIFT Saver et al, 2012 <sup>9</sup>                              |        |                          |         |                                                |                              |                 |                       |                          |                |
| Solitair                                                          | 58     | 18                       | 33      | 4 hr 53 min                                    | NA                           | 89              | 37                    | 17                       | 2              |
| Merci                                                             | 55     | 18                       | 47      | 5 hr 20 min                                    | NA                           | 67              | 28                    | 38                       | 11             |
| STAR, Pereira et al, 2013 <sup>35</sup>                           |        |                          |         |                                                |                              |                 |                       |                          |                |
| Solitair                                                          | 202    | 17                       | 59      | 4 hr 12 min                                    | 29                           | 95              | 58                    | 7                        | 2              |
| Trevo, San Román et al, 2012 <sup>36</sup>                        | 60     | 18                       | 55      | 3 hr 30 min <sup>c</sup>                       | 80 <sup>c</sup>              | 87              | 45                    | 28                       | 12             |
| Trevo, Medonça et al, 2013 <sup>37</sup>                          | 13     | 19                       | 54      | 3 hr 55 min                                    | 95                           | 77              | 31                    | 31                       | 0              |
| Trevo 2, Nogueira et al, 2012 <sup>8</sup>                        |        |                          |         |                                                |                              |                 |                       |                          |                |
| Trevo                                                             | revo88 | 19                       | 58      | 4 hr 36 min                                    | NA                           | 92              | 40                    | 34                       | 7              |
| Merci                                                             | 90     | 18                       | 50      | 4 hr 30 min                                    | NA                           | 77              | 22                    | 24                       | 9              |
| Revive, Rohde et al, 2011 <sup>38</sup>                           | 10     | 18                       | 90      | NA                                             | 89                           | 100             | NA                    | 30                       | 20             |
| pREset, Kurre et al, 2014 <sup>39</sup>                           | 271    | 15 <sup>e</sup>          | NA      | 4 hr 25 min                                    | 67                           | 98              | 40                    | 25                       | NA             |
| MR CLEAN, Berkhemer et al, 2015 <sup>11</sup>                     | 233    | 17                       | 87      | 4 hr 20 min <sup>c</sup>                       | NA                           | 81              | 33                    | 21                       | 8              |
| ESCAPE, Goyal et al, 2015 <sup>13</sup>                           | 165    | 16                       | 73      | NA                                             | 30 <sup>c,f</sup>            | 72 <sup>d</sup> | 53                    | 10                       | 4              |
| EXTEND-IA, Campbell et al, 2015 <sup>14</sup>                     | 35     | 13                       | 100     | 3 hr 30 min <sup>c</sup>                       | 43 <sup>c</sup>              | 93              | 71                    | 9                        | 0              |
| SWIFT PRIME, Saver et al, 2015 <sup>15</sup>                      | 98     | 17                       | 100     | 3 hr 44 min <sup>c</sup>                       | NA                           | 94              | 60                    | 12                       | 0              |
| REVASCAT, Jovin et al, 2015 <sup>12</sup>                         | 103    | 17                       | 68      | 4 hr 29 min <sup>c</sup>                       | 75 <sup>c</sup>              | 90              | 44                    | 18                       | 5              |
| Eric, Kahles et al, 2015 (current study)                          | 36     | 18                       | 55      | 6 hr 13 min<br>4 hr 57 min <sup>c</sup>        | 93 <sup>c</sup>              | 94              | 33                    | 28                       | 8              |

**Note:**—PST, Penumbra Pivotal Stroke Trial Investigators.

<sup>a</sup> Assessed at final follow-up (4 wk to 6 mo).

<sup>b</sup> Median time from onset to randomization.

<sup>c</sup> Median (value).

<sup>d</sup> TICI 2b-3.

<sup>e</sup> Mean (value).

<sup>f</sup> Groin puncture to first reperfusion.
